# Supplementary material for: How a universal health system reduces inequalities: lessons from England
Source: HighWire-hosted journal article supplement (doi:10.1136/jech-2015-206742), 2016-01-19
Supplement: jech-2015-206742supp_appendix2.pdf [file jech-2015-206742supp_appendix2.pdf]

## Appendix 2: Indirect age, sex standardisation of indicators at LSOA level

The indirect age sex standardisation process used to adjust the preventable hospitalisation and amenable mortality indicators:

$$adjusted\_count_{lsoa} = adjusted\_rate_{lsoa} \times population_{lsoa} \quad (1)$$

$$adjusted\_rate_{lsoa} = \frac{observed_{lsoa}}{expected_{lsoa}} \times rate_{national} \quad (2)$$

$$observed_{lsoa} = \sum_{sex} \sum_{age} events_{lsoa,age,sex} \quad (3)$$

$$expected_{lsoa} = \sum_{sex} \sum_{age} expected_{lsoa,age,sex} \quad (4)$$

$$expected_{lsoa,age,sex} = rate_{national,age,sex} \times population_{lsoa,age,sex} \quad (5)$$

$$rate_{national,age,sex} = \frac{\sum_{lsoa} events_{lsoa,age,sex}}{\sum_{lsoa} population_{lsoa,age,sex}} \quad (6)$$

$$rate_{national} = \frac{\sum_{lsoa} \sum_{sex} \sum_{age} events_{lsoa,age,sex}}{\sum_{lsoa} \sum_{sex} \sum_{age} population_{lsoa,age,sex}} \quad (7)$$

$$population_{lsoa} = \sum_{sex} \sum_{age} population_{lsoa,age,sex} \quad (8)$$

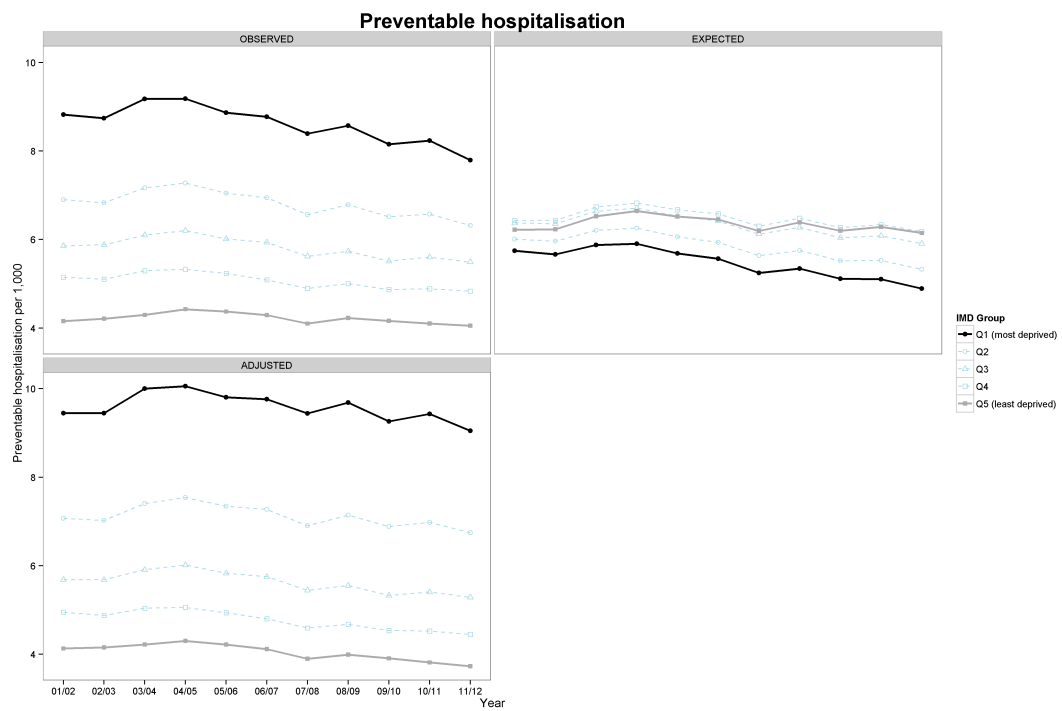

Figure 1: Preventable hospitalisation per 1,000 populations

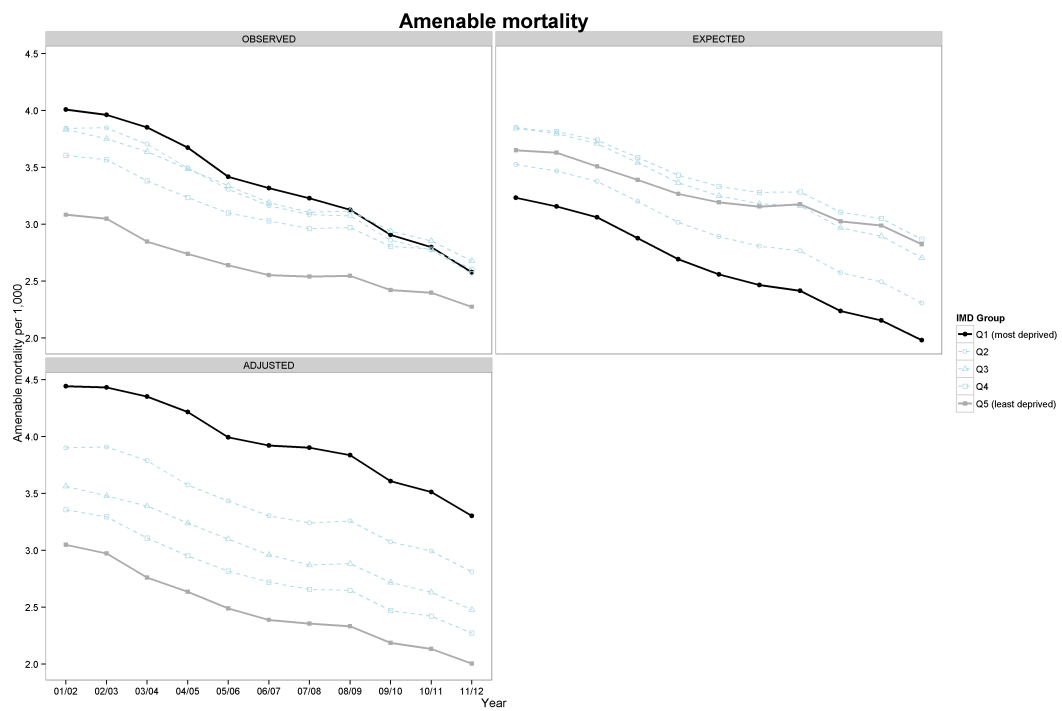

Figure 2: Amenable mortality per 1,000 population
